# Supplementary material
Source: Springer Nature journal article supplement (http://springermedizin.de/resource/supplementary/13019_2012_735_MOESM2_ESM.pdf/9639420)

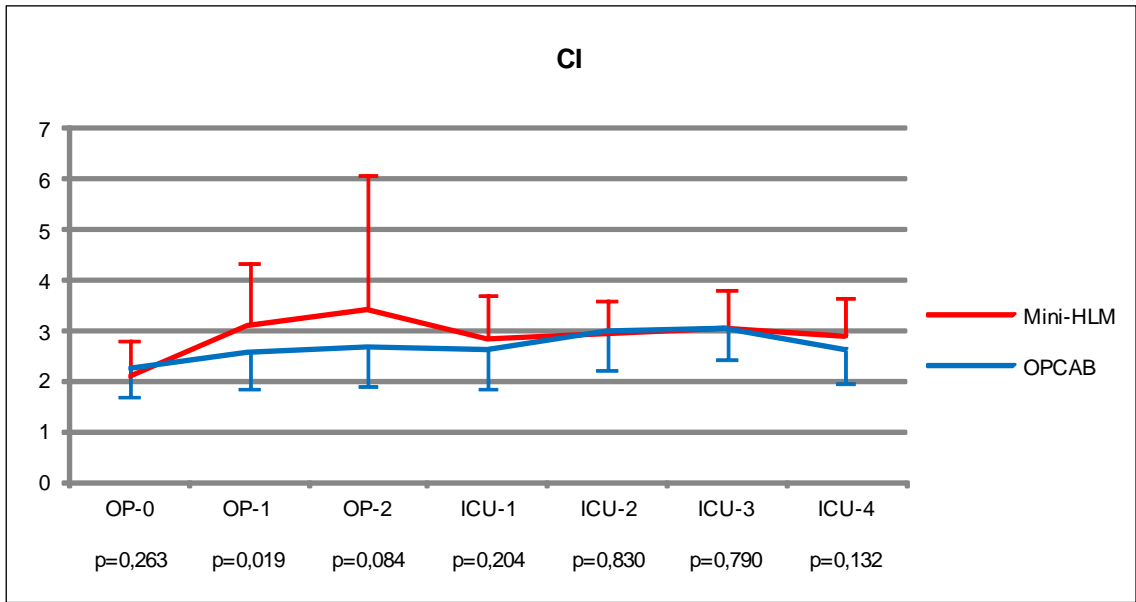

Figure 1b

Supplement: MOESM2 [file 9639420]
